# Supplementary material for: Experimental and theoretical insights into the corrosion inhibition activity of novel Schiff bases for aluminum alloy in acidic medium
Source: Royal Society of Chemistry journal article supplement (doi:10.1039/c9ra07105a), 2019-01-01
Supplement: c9ra07105a1.pdf [file c9ra07105a1.pdf]

## **Electronic Supplementary Information**

### **Experimental and theoretical insights into the corrosion inhibition activity of novel Schiff bases for aluminum alloy in acidic medium**

**Uzma Nazir<sup>a</sup>, Zareen Akhter<sup>a,\*</sup>, Naveed Zafar Ali<sup>b</sup> and Faiz Ullah Shah<sup>c,\*</sup>**

<sup>a</sup>Department of Chemistry, Quaid-i-Azam University, Islamabad-45320, Pakistan

<sup>b</sup>National Center for Physics, Quaid-i-Azam University Campus, Islamabad, Pakistan.

<sup>c</sup>Chemistry of Interfaces, Luleå University of Technology, 971 87 Luleå, Sweden

\*Corresponding authors: [zareenakhter@yahoo.com](mailto:zareenakhter@yahoo.com) and [faiz.ullah@ltu.se](mailto:faiz.ullah@ltu.se)

1H\_Ua1P in CDCl3

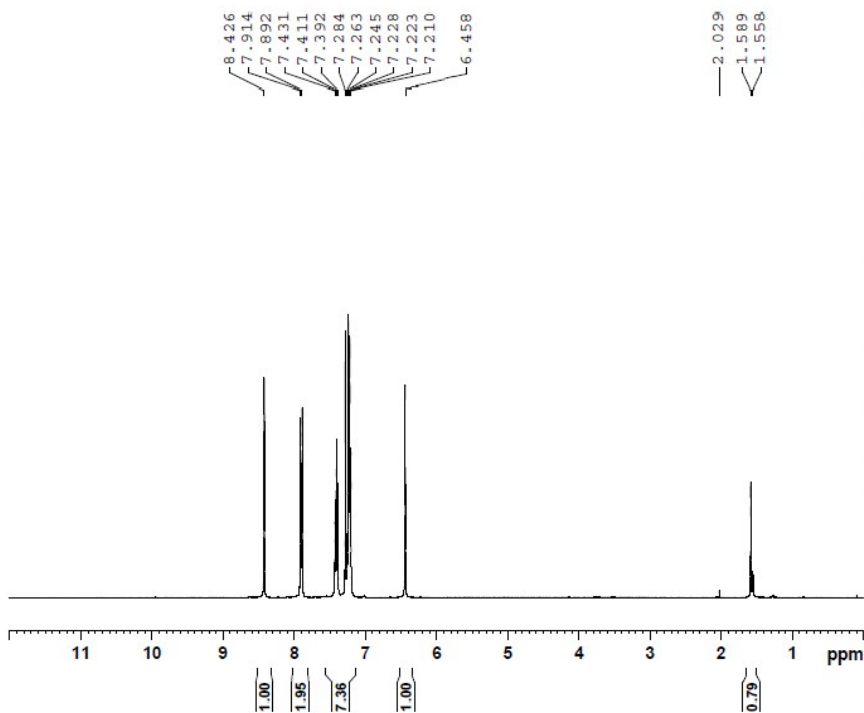

Fig. S1. <sup>1</sup>H NMR spectrum of UA in CDCl<sub>3</sub>

13C\_Ua1P in CDCl3

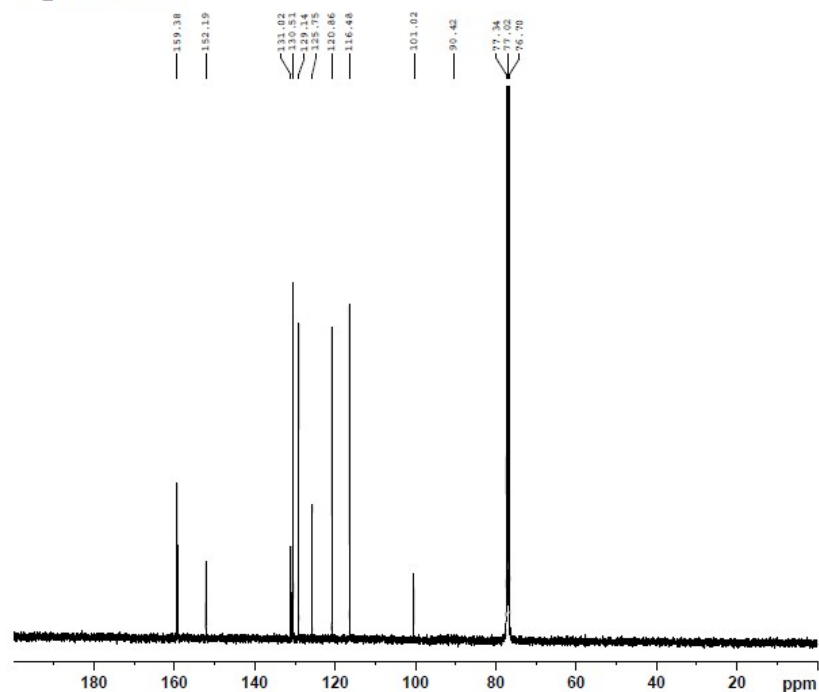

Fig. S2. <sup>13</sup>C NMR spectrum of UA in CDCl<sub>3</sub>

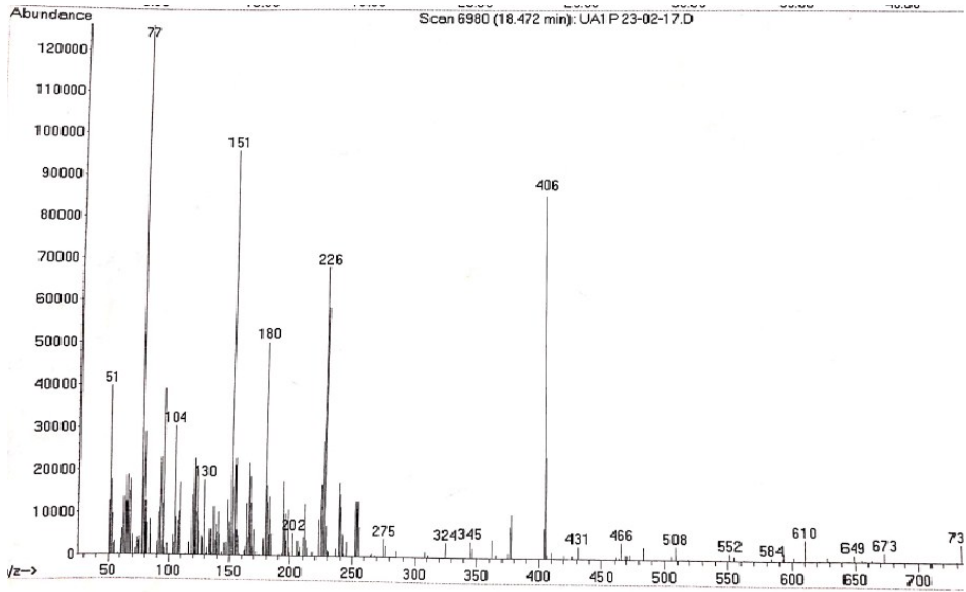

Fig. S3. GC Mass spectrum of UA

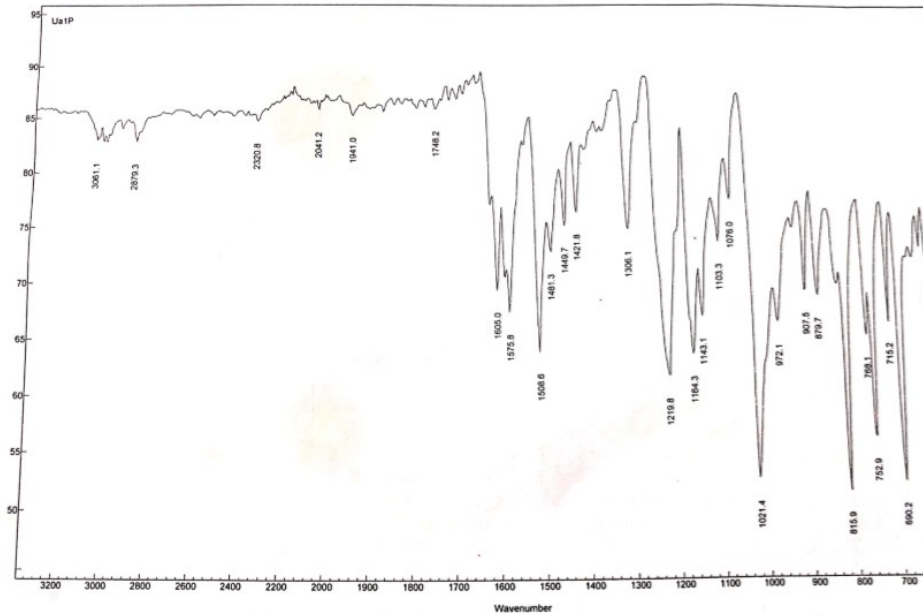

Fig. S4. FT-IR spectrum of UA

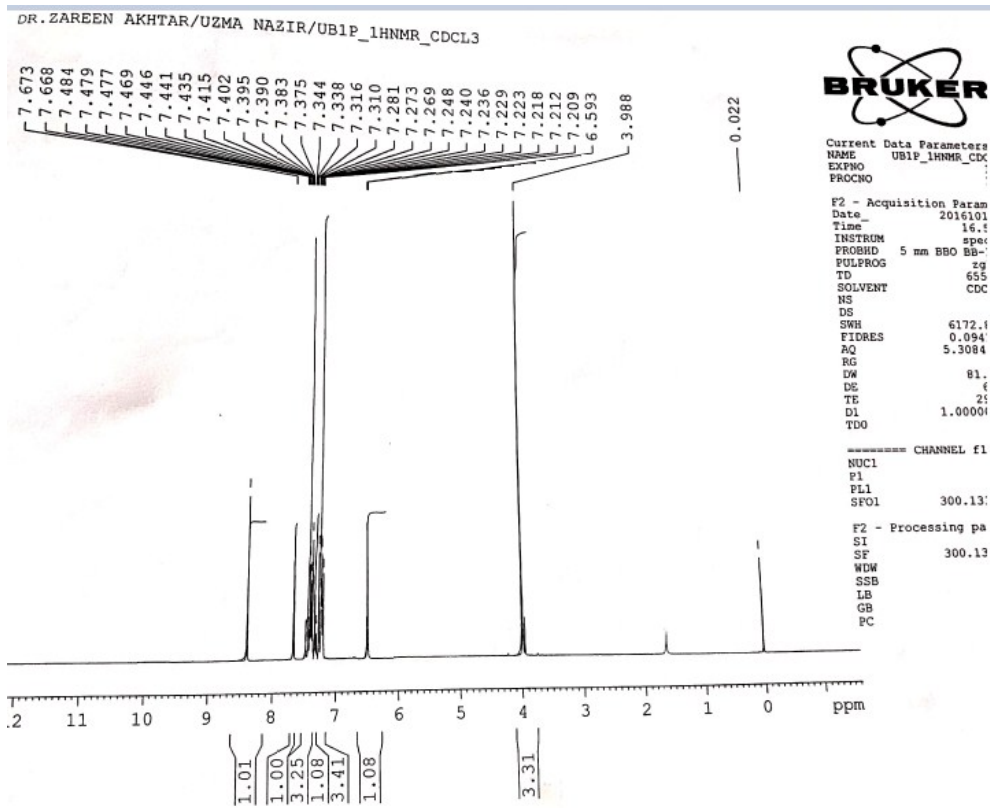

Fig. S5.  $^1\text{H}$  NMR spectrum of UB in  $\text{CDCl}_3$

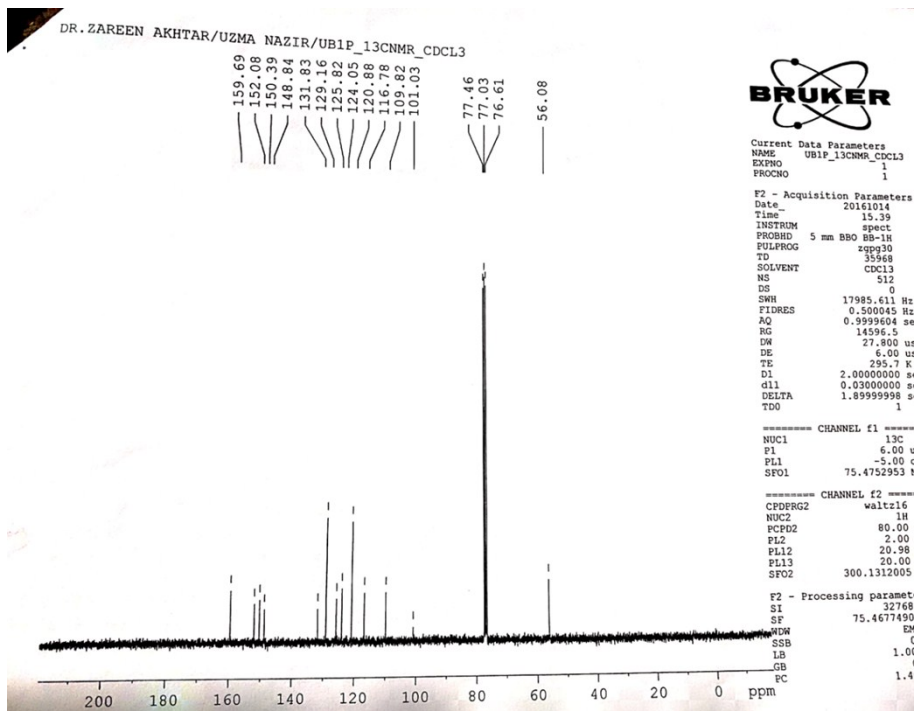

Fig. S6.  $^{13}\text{C}$  NMR spectrum of UB in  $\text{CDCl}_3$

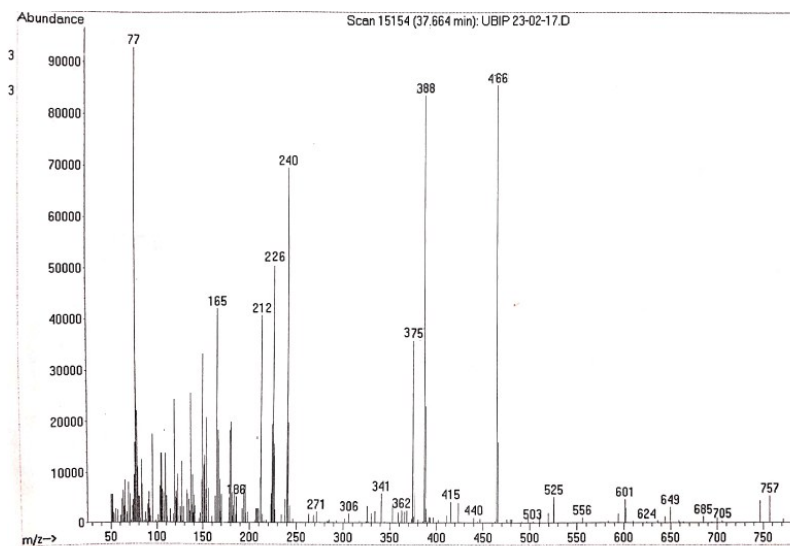

Fig. S7. GC Mass spectrum of UB

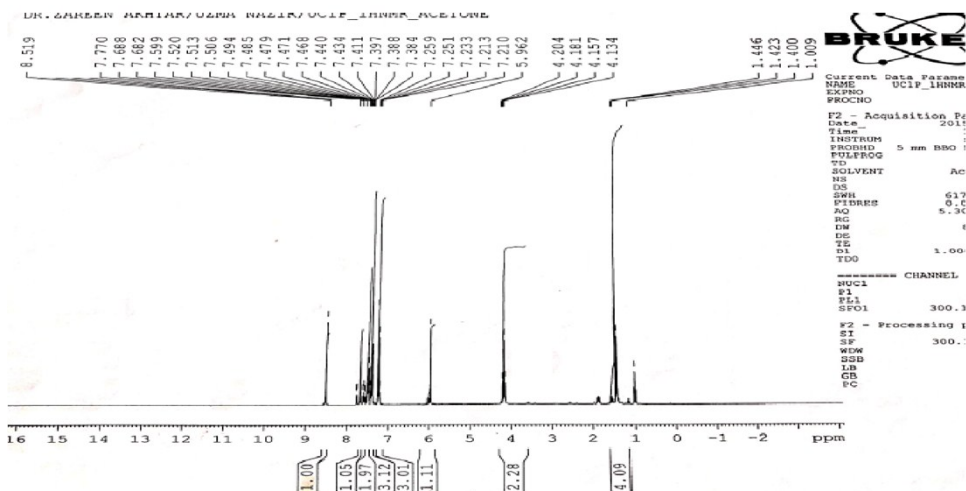

Fig. S8. <sup>1</sup>H NMR spectrum of UC in Acetone

ZAREEN AKHTAR/UZMA NAZIR/UC1P\_13CNMR\_ACETONE

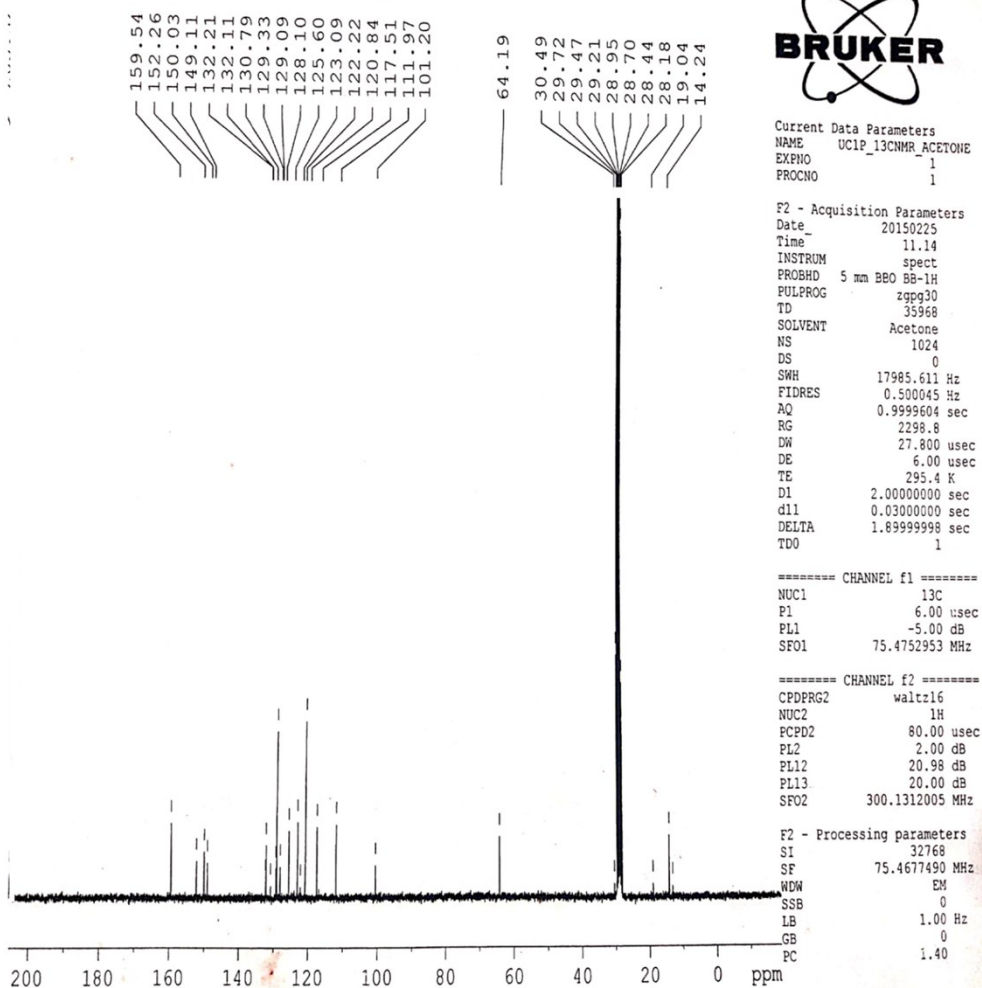

Fig. S9. <sup>13</sup>C NMR spectrum of UC in Acetone

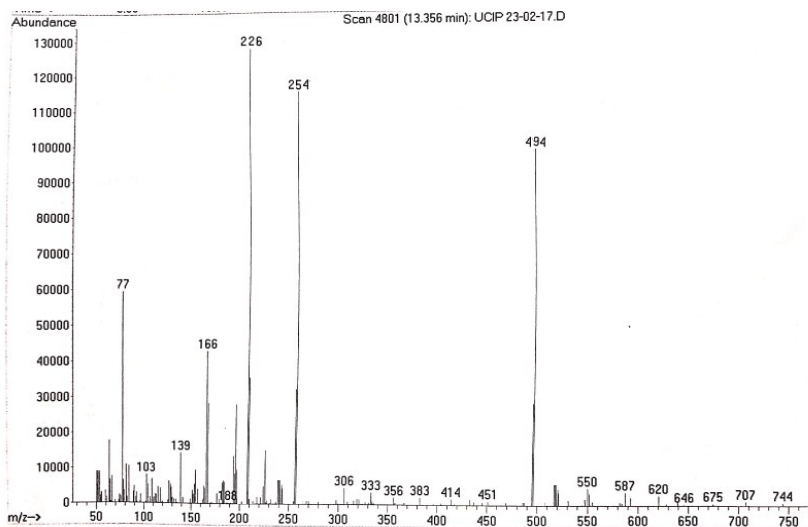

Fig. S10. GC Mass spectrum of UC

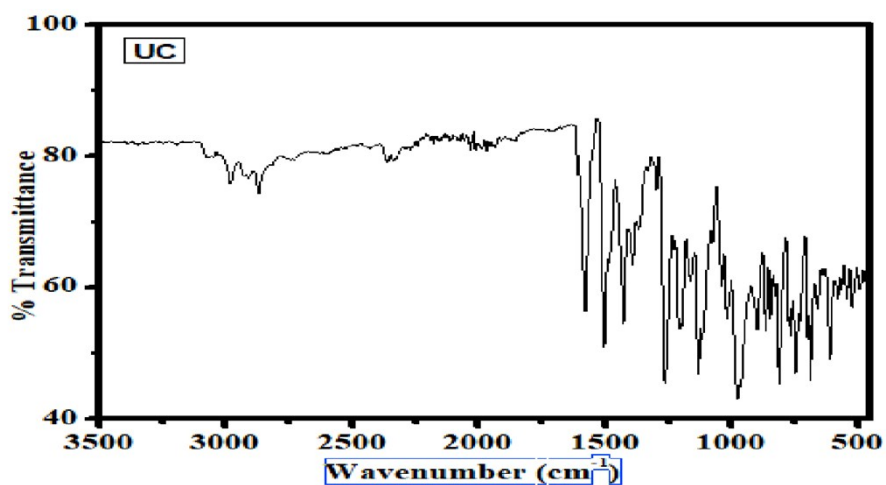

Fig. S11. FT-IR spectrum of UC
